# Supplementary material for: Uncovering the Role of PdePrx12 Peroxidase in Enhancing Disease Resistance in Poplar Trees
Source: MDPI journal article supplement (doi:10.3390/jof9040410), 2023-03-27
Supplement: s1 [file s1]

DNA, coding DNA sequence (CDS) and protein sequences of PdePRX12.

>PdePrx12\_DNA\_3114 bp

aaagactcaagaaactaaccaaccatggccagagctgctatgtccttcacctctctctctgattctctctctctcttagcttcttggtttgtgcc  
actgaagcacaaggcaccatccctatagtgatggcctgtcatggacattctacaagtctaaatgccctaaagtgaatcattataaggaaaca  
gctggagaaggtgttcaagaaggatacgaacaagctgctggcttgctcgtctccactccatgattgcttggtcagggttacaggatattcatat  
attcaaaactcatcttggaattactattatgttcagttgcaagggtcactattttgatcaaagaattaatgtctaaaatttaactctgcagggatgtga  
tggttcagattgcttgatggatcggcgagtggtccaagcgagcaggacgcccctcccaacctgacctgagagcaaaggcggttgatcat  
cgaagacctacgccggcgagtggaagggttgccgcttgctcgtctcctgttctgatattctgcgcttgacgccgtgactctgtttacctggt  
gagtcgacttgaaactctctgttatcgtagttttgataatgatcctagctagccagtagtgagcacatgatttaataccatctcctgtatcgttag  
atacacatccgtacatatatagccagccatattcttgagagtcgagtcctaaatcaggttttttttttgaataatgctttttccatataattttt  
aaaaagtagtgacttgattttttcaaaaatagcacacttaataaatttgaacacagtggttaataattatcttcttaggaaataggaat  
gagatttgggttcattgatttaataatacaataaaatagcctaattatggcctctgttagatgttaagtaacttattttataacataaaaaataata  
ttgagaataaagcgttcagtataaagcttagatttttaataaaatgaatttaattatcacaattattatggtattttctggaataagtgtaaaataa  
ctaaatacacatgaaataattacaatagaagattacgagaaagcagctcttctgtccccatataatatagtcctgcaacaaggggcataaa  
atgtgactgatcagaccagataagcttatccaatgttatcttcagagcttagatctccgctgtcgattcttccagttagtgatcagtgattcgga  
gaggcaataaattcctcataatctttaagagcccatcttcatattatggttactagcgattgtttattaaatatttttttaaaaaatatttaaagt  
aatatttttagattttttgactttaataataatgttaaaataactaaaaaattttttctcaaaaatactcttaccagcaacat  
tattattacacctctgtgactgtcatgatcattaaacacataaaagggtgtatataatgcatggctccttgagttctgctttgtaaaaaatattttt  
ttattttcaaaataagtttagattttttatgttgataataattttttttattcttttttaaaaaacattttgtatcacattccccgtgtgtgaataaatcaa  
ataaaattctttcggtaacaagtcattactcataaccaaagctaatcttttaacttctatgcattttgtctactgcagctcgtgggccagattata  
atgttcccttgggaaggcgagacggctctaaatttgcaactcaaaatgaaaccttagacaacctcccgccacctttgctaacgccgacacaat  
tctctcatctctgccaccaaggcggttgatgccaccgacgtggtagccctgtccggtggccacaccattggataagtcactgcagctctttca  
ctgaccgctctatccaaccaagatcctacaatggacaaaacctttgccaacaatcctcaagggaagtttccccacaagagacttcaataacac  
aacctgtgttgatattcgtatcctaataaatttgacaacaagtactatgttgatctcatgaatcgcaaggcctgtttacttcagaccaggactgtg  
acacgaacaagaagacaaggggcattgtcactagctttgctgttaatacaagtttgttctttgataagtttggttgcaatgatcaaaatgtcaca  
gtcgaaggcttgacaggaatacaggtgaaatccgcgccagttgctcggagagaaatcaggctacagttacttgagctcgtggtggaaga  
gggtctcgacgcactgtccggattaatatgaaagaagtaattctaataacatgaaaggccaaattccactagctagataaaaaatgctgggtc  
gttgtgcactgttaattatgggttcgttctgtcttttttaacaaaatgctgatgctatcttcttgacaactcaattctgttcttataaaaat  
agtcgaggatgtaacatatgagtttgatggctaataggacgttggcttgtcgaagttttataattataattacgggttcttagactaaagttga  
gattttgttcttgccgattagccctctccattgtctctgtgtcaaggctaagcaaatcccaatgggcatgcgttttagtttccaaatagggtc  
gtctatggcccatcgatccatgtcacaatttttagttacattcctggattggaccatcttgatgcgcttgatcaagaactttccacgagagtagct  
aaagaatttaggtttggttatggatttttttcaaaatttatcagtaaatcagcagttttgaaaaataattgagggatgtgcagttaatccaaac  
acttactattaacaaaattataatttttttaatgcatttaagaatcaaatttaaaagggactaaaactgtgcaaacattcaatttcttataaaca  
ttcaatttctcttttaattgctcaacctccctat

>PdePrx12\_CDS\_1065 bp

atggccagagctgctatgtccttcacctctctctctgattctctctctcttagcttcttggtttgtgccactgaagcacaaggcaccatccctat  
agtgaatggcctgtcatggacattctacaagtctaaatgccctaaagtgaatcattataaggaaacagctggagaaggtgttcaagaaggat  
atcgaacaagctgctggcttgctcgtctccactccatgattgcttggtcagggtatgtgatggttcagattgcttgatggatcggcgagtggtc  
caagcgagcaggacgccccccaacctgaccttgagagcaaggcggttgagatcatcgaagacctacgccggcgagtggaagggtt  
gcggccttgctcgtcctgttctgatattcttgcgcttgacgcccgtgactctgtttacctgtctggtggccagattataatgttcccttgggaagg  
cgagacgggtctaaaatttgcaactcaaaatgaaccttagacaacctcccgccacctttgctaacgccgacacaattctctatctctgccac  
caagggttgatgccaccgacgtggtagccctgtccggtggccacaccattggataagtcactgcagctcttctactgaccgctctatcca

acccaagatcctacaatggacaaaaccttgccaacaatctcaaggaagttgccccacaagagacttcaataacacaaccgtgttgatattc  
gatctcctaataaatttgacaacaagtactatgttgatctcatgaatcgccaaggcctgttacttcagaccaggactgtacacgaacaagaaga  
caaggggcattgtcactagctttgctgttaataaagttgttctttgataagttgtgggtgcaatgatcaaatgtcacagctcaaggcttgaca  
ggaaatcaaggtgaaatccgcgcagttgctcggagagaaatcaggctacagtacttgagctctgtggtggaagaggggtctcgacgcact  
gtccggattaatatga

>PdePrx12\_protein\_354 AA

MARAAMSFTSLLLISSLFLASWFCATEAQGTIPVNGLSWTFYKSKCPKVESIIRKQLEKVF  
KKDIEQAAGLLRLHFHDCFVQGCDGSVLLDGSASGPSEQDAPPNLT LRAKAFEIIEDLRRR  
VEKACGLVVSCSDILALAARDSVYLSGGPDYNNVPLGRRDGLKFATQNETLDNLPPPFANA  
DTILSSLATKGLDATDVVALSGGHTIGISHCSSFTDRLYPTQDPTMDKTFANNLKEVCPTRD  
FNNTTVLDIRSPNKF DNKYYVDLMNRQGLFTSDQDLYTNKKTRGIVTSFAVNQSLFFDKF  
VVAMIKMSQLKVL TNQGEIRASC SERNSGY SYLESVVEEGLDALSGLI
